# Supplementary material for: Arithmetic averaging: A versatile technique for smoothing and trend removal
Source: Oxford University Press journal article supplement (doi:10.1242/jeb.243687), 1993-12-31
Supplement: jeb243687supp.pdf [file jeb243687supp.pdf]

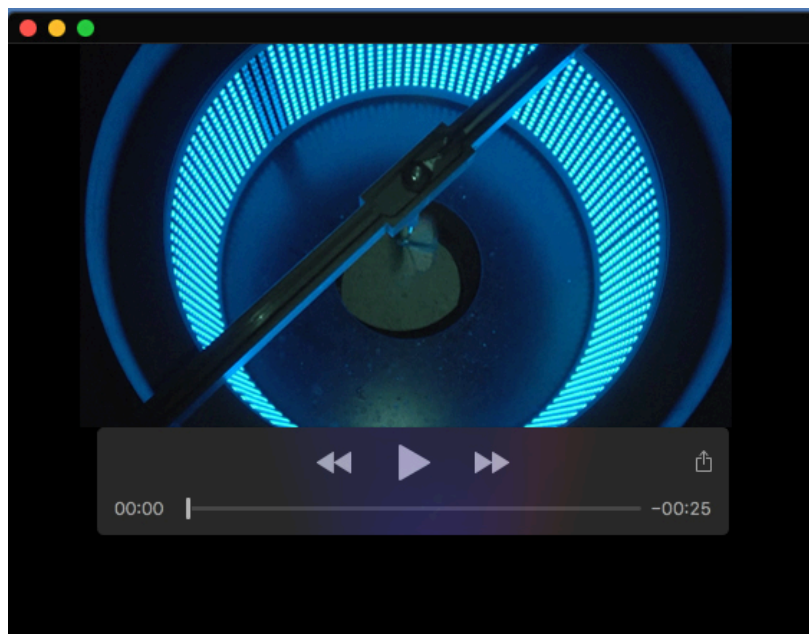

**Movie 1.** A butterfly tethered at the center of a flight simulator and flying with respect to a dark stripe on a bright background. The position of the stimulus was relocated by 180 deg every two minutes.

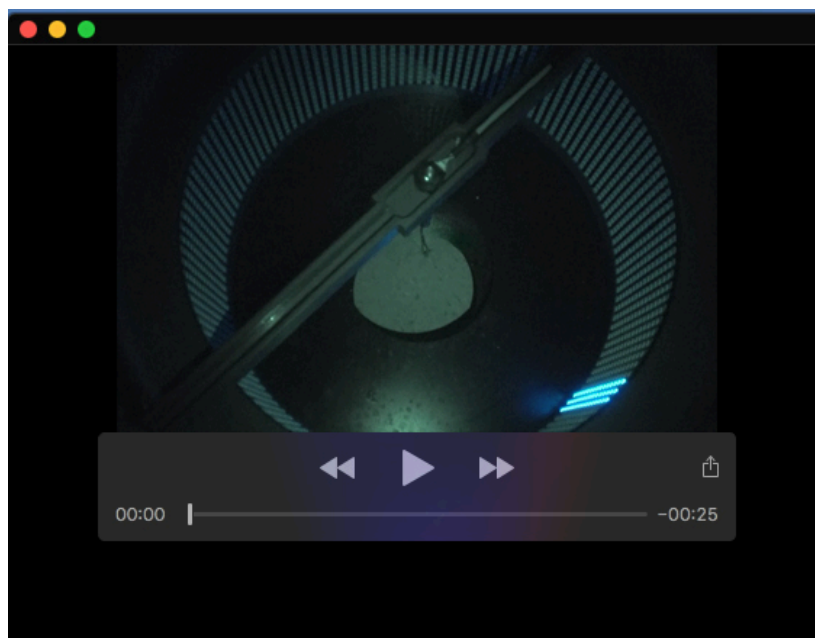

**Movie 2.** A tethered butterfly orienting with respect to a bright stripe on a dark background. The position of the stimulus was moved by 180 deg every second minute.

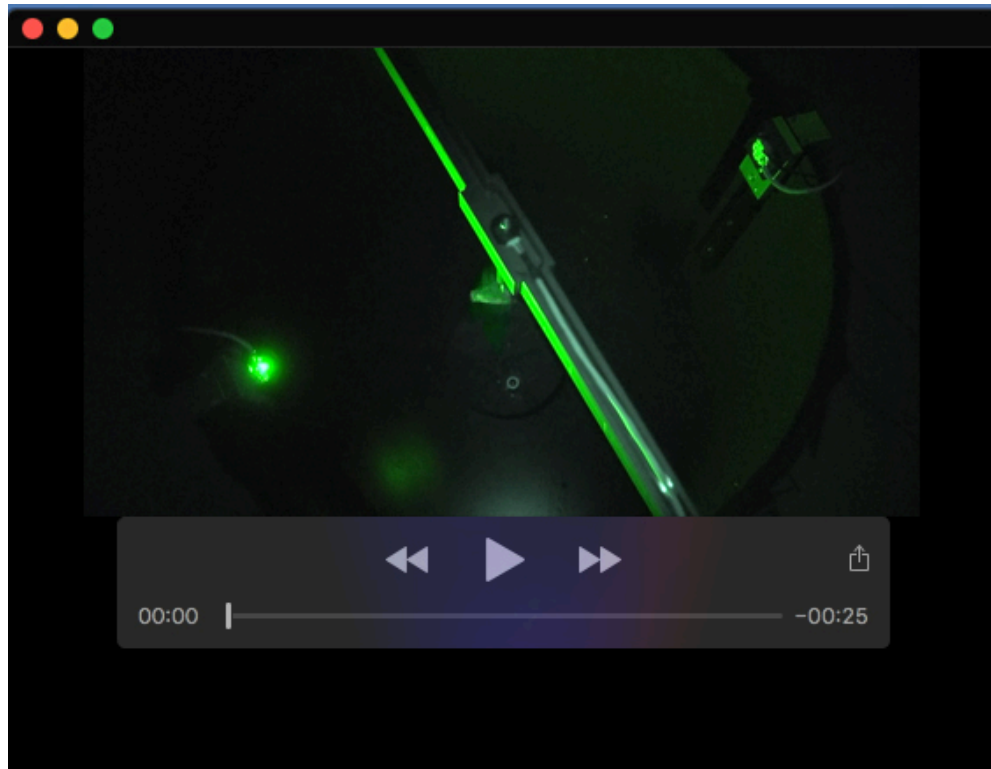

**Movie 3.** Movie of a butterfly tethered at the center of a simulator and using a sun stimulus (a bright green light spot) as an orientation reference. The position of the sun stimulus was changed by 180 deg every two minutes.
